# Supplementary material
Source: publisher site journal article supplement (https://www.dovepress.com/article/supplementary_file/622748/622748%20Revised%20Supplementary%20Figure%201.docx)

**Supplementary Figure 1** Absolute standardized differences before and after matching


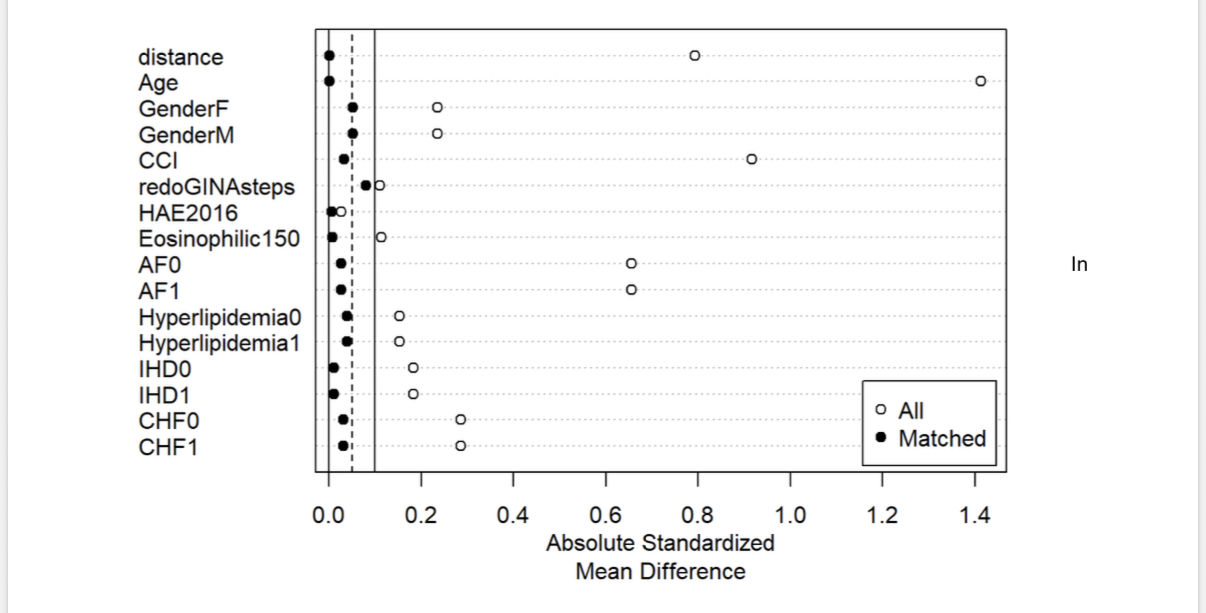

Supplement: Supplementary file 1 [file 622748%20Revised%20Supplementary%20Figure%201.docx]
